# Supplementary material
Source: PubMed Central journal article supplement (PMC4423734)

Figure S1

A

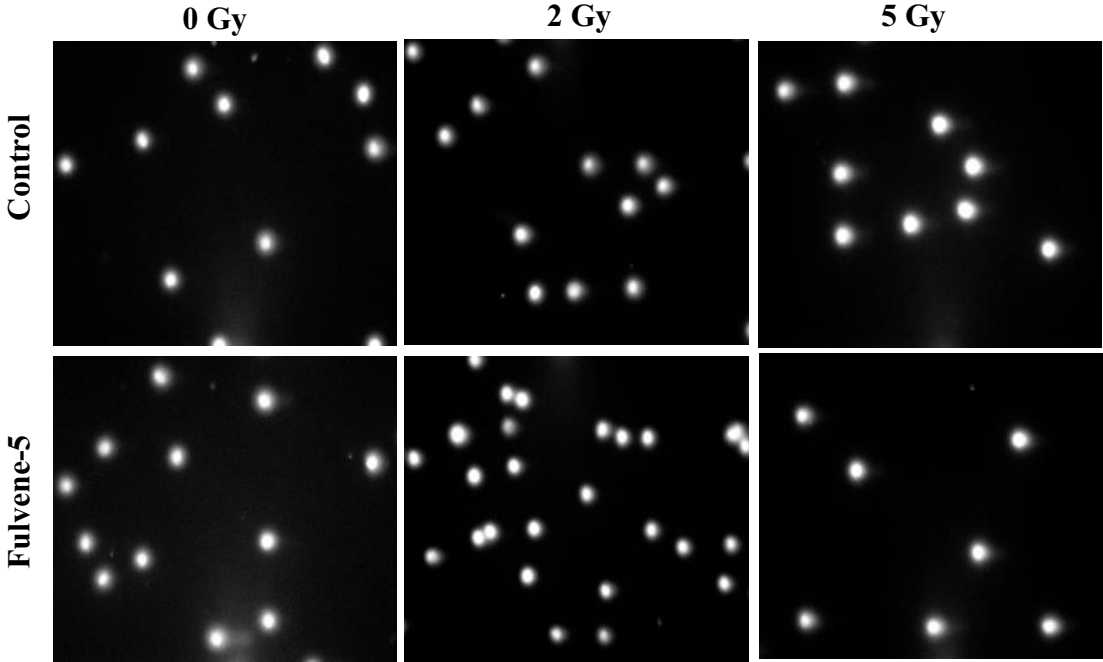

B

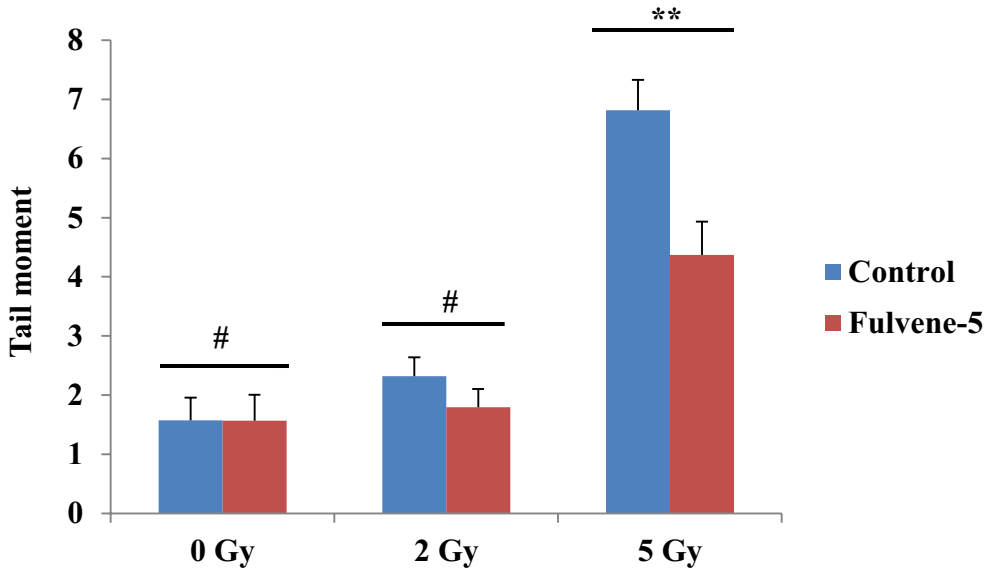

Figure S2

A

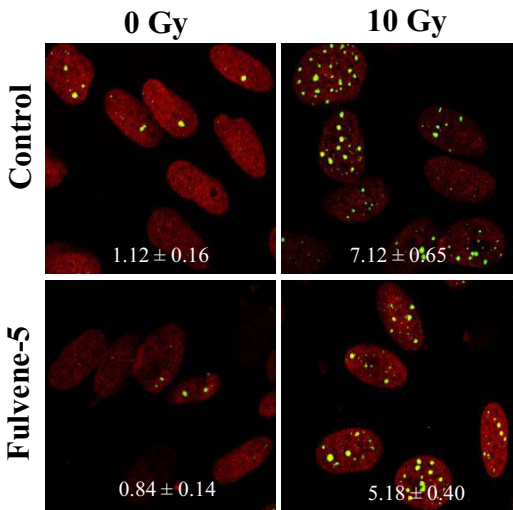

B

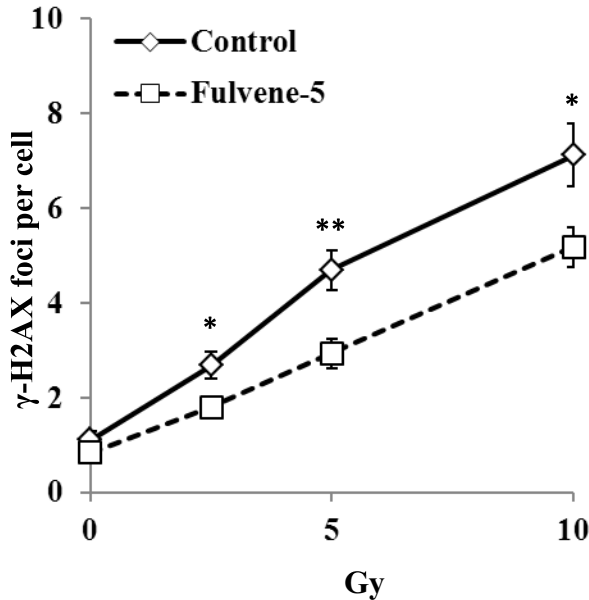

C

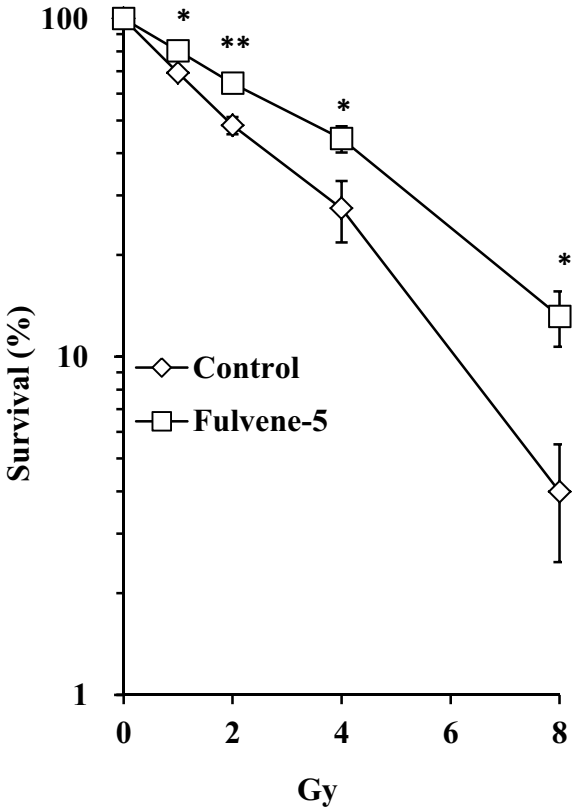

Figure S3

A

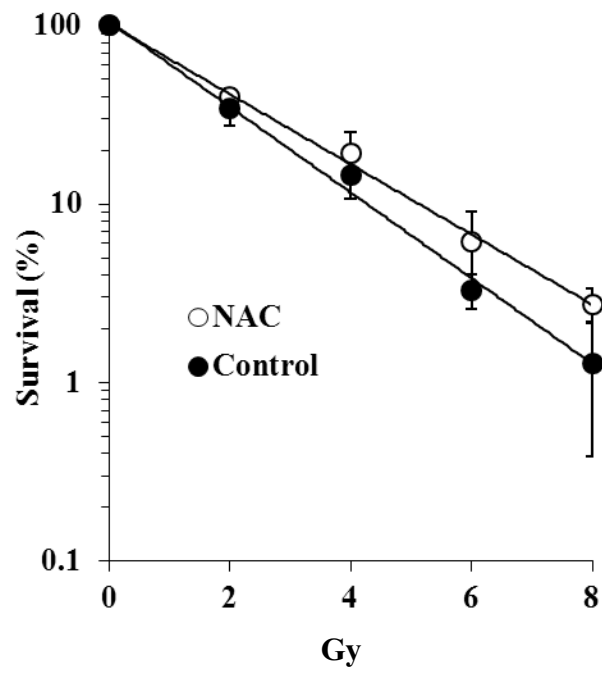

B

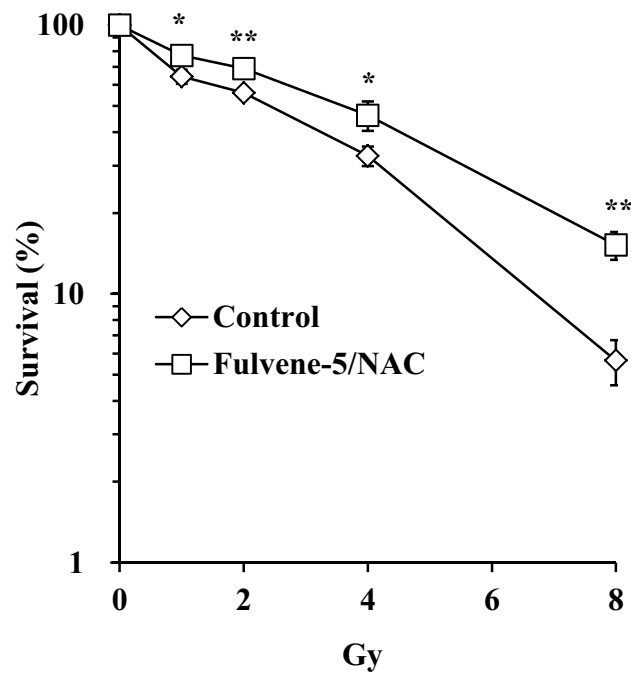

Figure S4

A

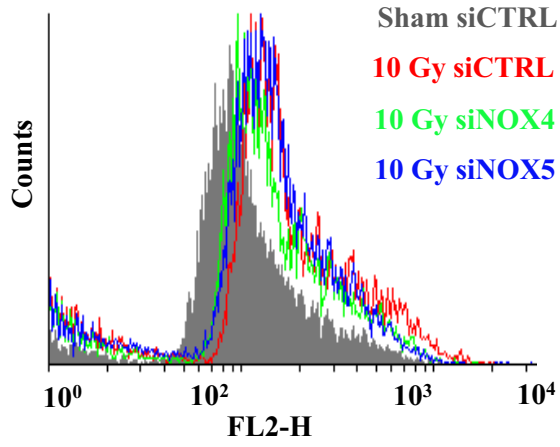

B

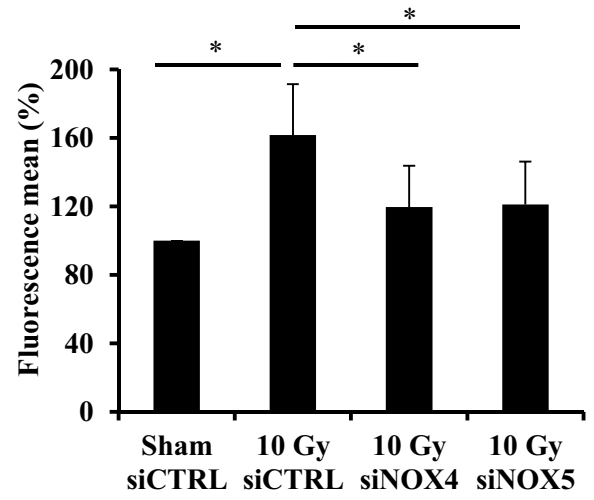

C

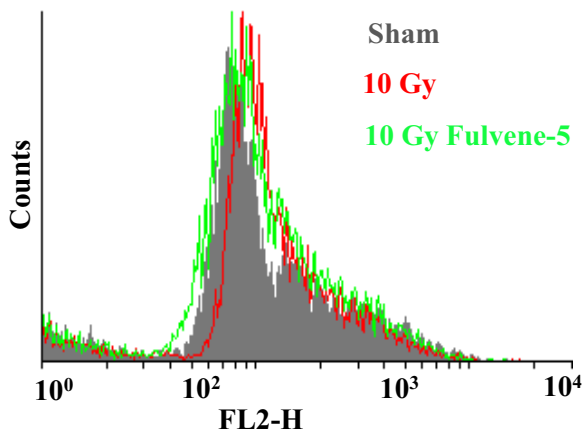

D

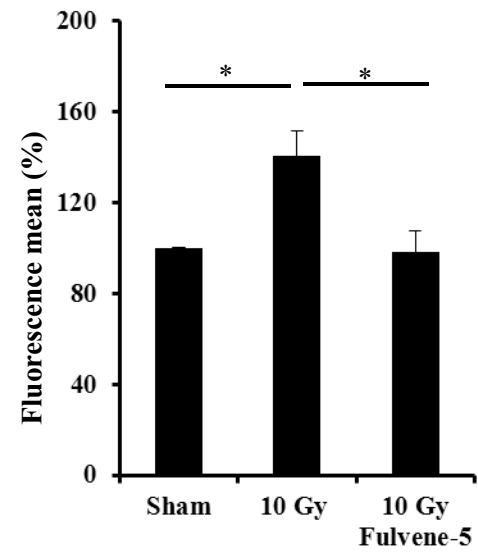

Supplement: NIHMS681370-supplement-Supplemental_data.pdf [file NIHMS681370-supplement-Supplemental_data.pdf]
